CELL SCIENCE AT A GLANCE

# Embryo–epithelium interactions during implantation at a glance

John D. Aplin\* and Peter T. Ruane

**ABSTRACT**

At implantation, with the acquisition of a receptive phenotype in the uterine epithelium, an initial tenuous attachment of embryonic trophoblast initiates reorganisation of epithelial polarity to enable stable embryo attachment and the differentiation of invasive trophoblasts. In this Cell Science at a Glance article, we describe cellular and molecular events during the epithelial phase of implantation in rodent, drawing on morphological studies both *in vivo* and *in vitro*, and genetic models. Evidence is emerging for a repertoire of transcription factors downstream of the master steroidal regulators estrogen and progesterone that coordinate alterations in epithelial polarity, delivery of signals to the stroma and epithelial cell death or displacement. We discuss what is known of the cell interactions that occur during implantation, before considering

specific adhesion molecules. We compare the rodent data with our much more limited knowledge of the human system, where direct mechanistic evidence is hard to obtain. In the accompanying poster, we represent the embryo–epithelium interactions in humans and laboratory rodents, highlighting similarities and differences, as well as depict some of the key cell biological events that enable interstitial implantation to occur.

**KEY WORDS:** Adhesion, Blastocyst, Endometrium, Epithelium, Trophoblast

**Introduction**

Implantation is the stage of pregnancy at which stable adhesion is initiated between the embryo and maternal tissue. Blastocyst-stage embryos hatch from the zona pellucida, exposing trophoblast – which forms the primary interface with the endometrial epithelium. Blastocyst attachment initiates a complex cascade of events that lead to the development of a placenta; these vary greatly between species, giving rise to a huge diversity of placental forms (Bazer et al., 2009; Mossman, 1987).

Maternal and Fetal Health Research Group, Manchester Academic Health Sciences Centre, St Mary’s Hospital, University of Manchester, Manchester M13 9WL, UK.

\*Author for correspondence (john.aplin@manchester.ac.uk)

DOI: 10.1242/jcs.175943

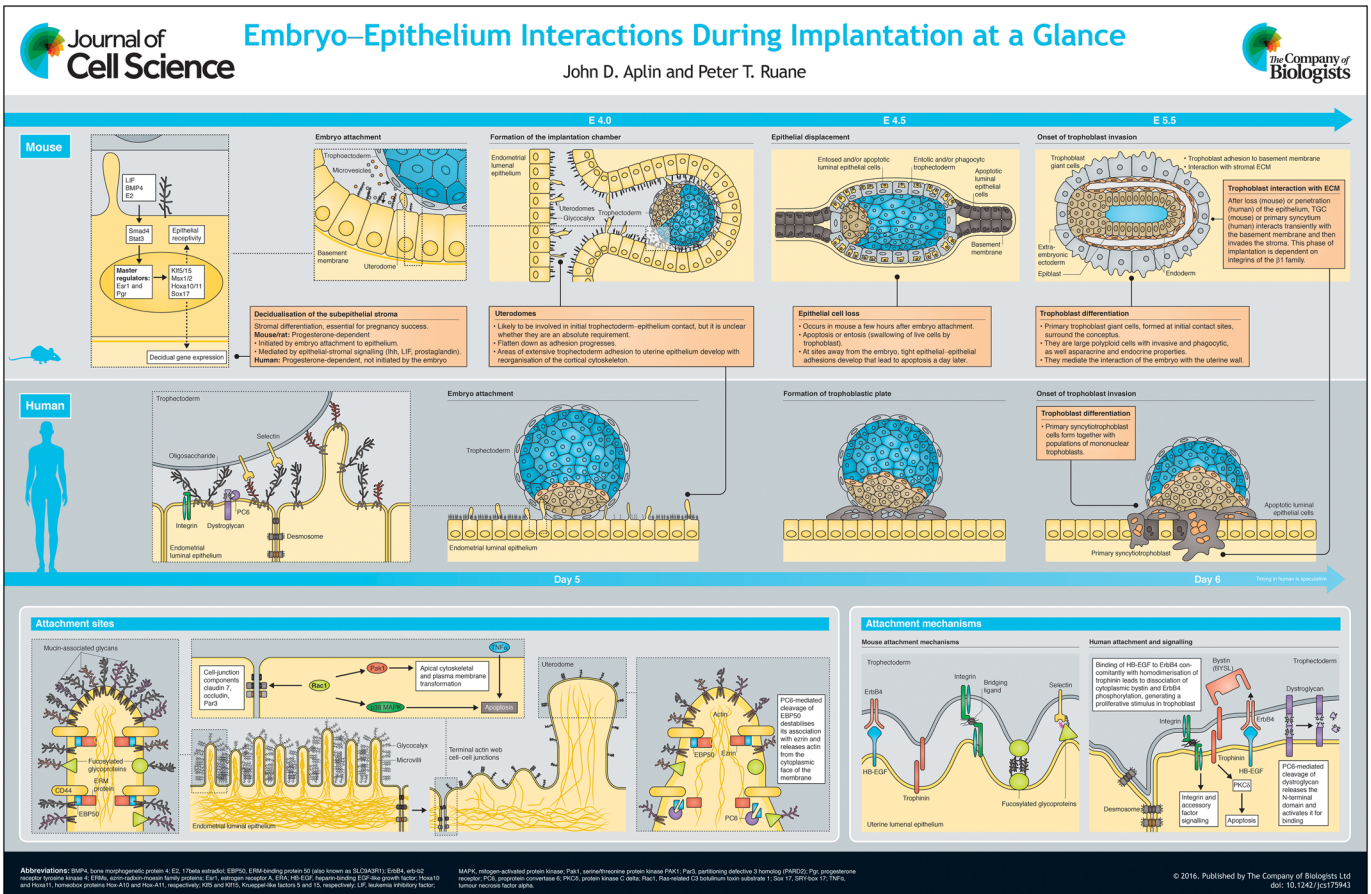

The fascination of one of life's founding stages is even more compelling in light of the observation that, in our species, many embryos fail to implant, both in natural conception and following replacement after *in vitro* fertilisation (IVF) (Aplin and Kimber, 2004; Kupka et al., 2014). Present knowledge relies partly on *in vitro* models in which embryos, or trophoblastic spheroids derived from cell lines, primary tissue or embryonic stem cells, attach to 2D or 3D cultures of endometrial epithelium from either primary tissue or cell lines (Bentin-Ley et al., 1994; Bogavarapu et al., 2016; Hannan et al., 2009; Kang et al., 2015, 2014; Lalitkumar et al., 2013; Lee et al., 2015; Singh and Aplin, 2015; Singh et al., 2010; Weimar et al., 2013). Recent observations of embryos attaching directly to cell-free surfaces demonstrate their self-organising potential (Deglincerti et al., 2016; Shahbazi et al., 2016). However, implantation in maternal tissue is, ultimately, essential for developmental progression. Below, we discuss broadly events initiated by trophoctoderm attachment to the uterine epithelium by considering both cell populations, then examine in more detail what is known of intercellular adhesion mechanisms, signalling, cell polarity and the ultimate fate of the epithelial cells.

#### Epithelium–trophoctoderm interaction in laboratory rodents

In mouse, apposition of the hatched blastocyst to the endometrial epithelium occurs on the fourth day after mating, with attachment on the fifth day. Embryos transferred to recipient uteri before or after this time do not implant, demonstrating maternal control of receptivity through the action of estrogen and progesterone (Aplin, 2006; Aplin and Kimber, 2004). The receptive status lasts less than 24 h, after which transferred blastocysts fail to implant (Cha and Dey, 2014).

Embryos become positioned in crypts that branch off the antimesometrial uterine lumen under the influence of Wnt5a-mediated receptor tyrosine kinase-like orphan receptor (ROR) signalling (Cha et al., 2014). Apical swellings known as uterodomes (or pinopodes) – which appear to be absorptive – grow from the surface of some cells, and microvilli become less regular and shorter (Martel et al., 1991; see poster). The lumen closes around the blastocyst to create an implantation chamber; this requires fluid pinocytosis by epithelial cells, a process that might depend on the epithelial sodium channel ENaC, which is activated downstream of the tyrosine kinase SGK-1 (Ruan et al., 2012; Salker et al., 2011). Failure of luminal closure is associated with implantation failure, as seen in mouse uterus lacking the three SMAD family members SMAD1, SMAD4 and SMAD5 (Rodriguez et al., 2016). As the trophoctoderm comes into contact with the apical epithelial surface, there is a loss of surface projections from the latter, with the progressive development of continuous close adhesion (20 nm) between the two surfaces. Flattened vesicular projections between the two surfaces might represent residual uterodomes (Fouladi-Nashta et al., 2005; Potts, 1968). At least in rat, reorganisation of the apical epithelial surface can occur in the absence of an embryo; it occurs in response to the combination of estrogen and progesterone (Luxford and Murphy, 1992). Plasma membrane transformation is accompanied by a redistribution of actin from a terminal web, with bundles extending into microvilli to less organised and less dense apical actin bundles, which usually are positioned further inward from the apical plasma membrane (Lindsay and Murphy, 2008; Murphy, 2004; see poster).

Hatched embryos require activation to implant and the process can arrest at this stage (*in vivo* this is known as diapause). An estrogen pulse on day 4 stimulates uterine receptivity and, also – through locally produced catecholesterone – embryonic activation

(Paria et al., 1998; Qu et al., 2015). Signals from attached trophoctoderm are transduced by epithelial cells to initiate decidualisation, a wave of cell differentiation that is initiated in the superficial antimesometrial stroma (see poster); this process is dependent on the activation of gene networks downstream of the progesterone receptor and has been reviewed comprehensively elsewhere (Cha and Dey, 2014; Cha et al., 2012; Wetendorf and DeMayo, 2014; Zhang et al., 2013).

There are now two populations of uterine luminal epithelial cells: those at the inter-implantation site and those in contact with trophoctoderm. Epithelial cells at the implantation site (Potts, 1968) undergo cell death or entosis (ingestion of live cells by the trophoblast) a few hours after attachment (Fouladi-Nashta et al., 2005; Li et al., 2015; Parr and Parr, 1989; Schlafke and Enders, 1975). Absence of the transcription factor Klf5 or the small GTPase Rac1 causes retention of viable epithelial cells in the chamber, and implantation fails (Sun et al., 2012). Adjacent epithelial cells that do not adhere to trophoctoderm come into apical contact with epithelium at the opposing side of the lumen (Wallingford et al., 2013; see poster) and degenerate one or two days later, with evidence of apoptosis (Joswig et al., 2003; Welsh and Enders, 1991). At the implantation site, primary trophoblast giant cells form a direct interface with uterine stromal tissue, known as decidua. The conceptus remains centrally positioned, and enclosed by polar and mural trophoblast giant cells (see poster).

#### Epithelium–trophoctoderm interaction in humans

In humans, implantation takes place in the mid-secretory (sometimes referred to as the receptive) phase of the menstrual cycle, about a week after ovulation. The endometrial epithelium contains both microvillous and ciliated (2–7%) cells (Dockery and Burke, 2008). At this time, uterodomes grow from the surface of some cells, and microvilli become less regular and shorter (see poster).

Only a few direct observations of the epithelial phase have been made. For instance, a series from the mid-20th century documents 34 implantation sites (Hertig et al., 1956) has been curated by Allen C. Enders, University of California Davis, School of Medicine, CA (see 'Resources' at <http://www.trophoblast.cam.ac.uk/Resources/enders>). Here, initial stages are absent; this suggests that the earliest attached blastocysts must have been displaced during processing of the tissue for histology. However, embryos in the process of crossing the epithelium are preserved, as well as those at later stages of stromal invasion. Several important differences when compared to mouse can be noted (see poster). For example, the lumen does not close down to create an implantation chamber. In addition, loss or displacement of epithelial cells occurs from a very restricted area beneath the conceptus and, once the trophoblast is in contact with underlying stroma, it expands beneath the epithelium and invades deeper. Trophoblast proliferation and differentiation then occur rapidly to form numerous primary syncytial elements, as well as the mononuclear cytotrophoblast. In contrast to mouse, signalling to initiate stromal decidualisation does not depend on the presence of an embryo; rather, it follows a temporal programme in response to maternal progesterone and androgen. Stroma encountered by the earliest invading trophoblast is not yet decidualised, although the cellular programme has been already initiated as pre-implantation progesterone levels rise (Gellersen and Brosens, 2014). Once the stroma has been penetrated, the epithelium seals over.

#### Cell adhesion at implantation

Historically, implantation has been described in stages of apposition, attachment and invasion. *In vitro*, the initial weak

interactions between embryos and epithelial cells (see Box 1) are reversible but, thereafter, a more stable attachment is established.

### Trophinin and HB-EGF

Trophinin is one of three membrane proteins derived from the TRO gene (also known as MAGE-D3) (Kim et al., 2014) and mediates  $\text{Ca}^{2+}$ -independent homophilic cell adhesion in synergy with its cytoplasmic partners tascin (also known as TROAP), bystin and ErbB4 (Fukuda and Sugihara, 2012; see poster). Binding of trophinin from an adjacent cell is predicted to dissociate bystin, thereby permitting phosphorylation of ErbB4 when heparin-binding epidermal-like growth factor (HB-EGF) is bound to ErbB4 (Sugihara et al., 2007). In trophectoderm, this produces a contact-dependent proliferative signal, whereas – in epithelial cells – homophilic trans-ligation of trophinin induces tyrosine phosphorylation of protein kinase  $\text{C}\delta$  (PKC $\delta$ ) and its translocation into the nucleus, which leads to apoptosis (Tamura et al., 2011). Wild-type mice blastocysts and uterus both express trophinin between 3.5 and 5.5 days post coitum but mice lacking it are fertile, so trophinin-mediated adhesion is dispensable at implantation

(Nadano et al., 2002; please notice the comments on integrin knock-outs in Box 2). HB-EGF is required in the mouse endometrium, where it appears to act as both a signalling and adhesion factor (Lim and Dey, 2009; Xie et al., 2007).

### Dystroglycan

Dystroglycan (DAG1) is found in endometrial luminal and glandular epithelium. Attachment of trophoblast spheroids to epithelium *in vitro* suggests a role for DAG1 in embryo–epithelium attachment (Heng et al., 2015); glycan modifications on its mucin-like domain might interact with lectin on the cell surface or, alternatively, an extracellular ligand might bridge DAG1 at the epithelium with integrins on the trophectoderm. The N-terminal domain of the extracellular subunit of integrin  $\alpha$  blocks binding of extracellular matrix ligands but this can be released through PC6-mediated cleavage. DAG1-null embryos pass the implantation stage but, thereafter, exhibit an embryonic lethal phenotype (Williamson et al., 1997).

### Integrin expression and activation in the blastocyst

Activation of mouse blastocysts by catechol estrogen brings integrins to the outer trophectodermal surface (Qu et al., 2015), whereas spontaneously or artificially hatched human blastocysts express several integrins (Campbell et al., 1995) and are competent to attach straight away. Integrins  $\alpha\text{v}\beta\text{3}$ ,  $\alpha\text{5}\beta\text{1}$  and  $\alpha\text{6}\beta\text{1}$  are present in the early and late mouse blastocyst, whereas the  $\alpha\text{2}$ ,  $\alpha\text{6A}$  and  $\alpha\text{7}$  subunits appear in the late blastocyst, and  $\alpha\text{1}$  appears only in outgrowths (Sutherland et al., 1988, 1993; see also Box 2). In mice, binding of fibronectin, vitronectin or OPN to the blastocyst stimulates the trafficking of integrins to the mouse trophectodermal surface and the assembly of focal contact-like structures, as indicated by the presence of the focal adhesion markers vinculin and talin (Chaen et al., 2012; Schultz and Armant, 1995; Schultz et al., 1997; Yelian et al., 1995). Integrin signalling modulates trophoblast adhesion through the activation of phospholipase  $\text{C}\gamma$  to initiate phosphoinositide signalling and intracellular  $\text{Ca}^{2+}$  mobilisation (Wang and Armant, 2002; Wang et al., 2007). Accordingly, on substrates containing extracellular matrix ligands, trophoblast outgrowth ensues (Sutherland et al., 1988, 1993). Implantation fails in the integrin- $\beta\text{1}$ -null mouse when trophoblast has penetrated the epithelium and is beginning to interact with the underlying extracellular matrix (Stephens et al., 1995). The laminin receptors  $\alpha\text{1}\beta\text{1}$ ,  $\alpha\text{6}\beta\text{1}$  and  $\alpha\text{7}\beta\text{1}$  are likely to be important at this stage. Furthermore, the integrin  $\beta\text{1}$  interactor CD147 (EMMPRIN, officially known as basigin) is required for optimal implantation (Igakura et al., 1998; Kuno et al., 1998; Lee et al., 2013; Noguchi et al., 2003; Xiao et al., 2002).

### Epithelial polarity and gene expression

A programme of epithelial gene expression that controls implantation is evident from studies of genetically altered mice (Cha and Dey, 2014; Wang and Dey, 2006). Downstream of the master control of estrogen and progesterone receptors lies a hierarchy of transcription factors, including Klf5, Msx1 and Msx2, Sox17 (Hirate et al., 2016), and Hoxa10 and Hoxa11 (Vasquez and DeMayo, 2013). Epithelial transcription factors can profoundly affect gene expression in uterine stromal cells, presumably through paracrine signals, as demonstrated by the repertoire of mRNA species from stromal cells and extracellular matrix (ECM), which are altered by conditional ablation of Msx1 and Msx2 (Sun et al., 2016). Here, the epithelial surface is a key locus of control – as exemplified by failure of implantation in mice

#### Box 1: Role of mucin and glycan in initial attachment

The cell surface intercalating mucins MUC1 and MUC16 are prominent in the apical uterine epithelial glycocalyx (Aplin et al., 2001; Dharmaraj et al., 2014; Díaz-Gimeno et al., 2014; Fukuda and Sugihara, 2008; Fukuda et al., 2008; Gipson et al., 2008; see poster). In mouse, MUC1 is downregulated under maternal hormonal control starting on day 3, so that the glycocalyx is reduced by the time the embryo begins to attach. However, the loss of MUC1, although it may be necessary for implantation, is not sufficient to convey full receptivity on the mouse epithelium (Fouladi-Nashta et al., 2005). In human, both MUC1 and MUC16 are expressed in the endometrial luminal epithelium throughout the menstrual cycle. However, local clearance of MUC1 (MUC16 has not been mapped) occurs beneath and adjacent to the attached embryo (Meseguer et al., 2001; Singh et al., 2010); this is possibly mediated by the matrix metalloproteinases ADAM17 or MMP14 (Julian et al., 2009; Thathiah et al., 2003; Thathiah and Carson, 2004), or an embryo-derived trypsin-like protease (Brosens et al., 2014). Uterodomes (see poster) have a thinner glycocalyx (Gipson et al., 2008; Lopata et al., 2002) so that initial interaction with the embryo is facilitated. However, they might not be an absolute requirement for implantation (Quinn and Casper, 2009).

The idea of a barrier that needs to be overcome in order to make implantation possible is attractive in that it imposes a ‘health test’ on embryos (Quenby et al., 2002). Many human embryos have chromosome abnormalities, so failure to attach – with loss of the pregnancy – would immediately result in the onset of a subsequent, potentially fertile menstrual cycle. There is some clinical evidence that this, indeed, occurs as monosomic embryos can develop to blastocysts that look normal but are never found in later products of conception, suggesting failure at or soon after implantation. By contrast, some women recurrently fail to become pregnant when ‘good quality’ embryos have been transferred after IVF, and do not show overt evidence of miscarriage (Koot et al., 2011). Embryos initially form tenuous and reversible attachments to epithelial cells. The mucin-associated fucosylated glycans sulpho-sialyl Lewis X, Lewis Y (SsLe $\text{x}$  and Le $\text{y}$ , respectively) and H type 1 are candidates for mediating this interaction, either by direct binding of H type 1 to Le $\text{y}$  or by binding of SsLe $\text{x}$  to L-selectin on the embryo (Aplin and Jones, 2012; Aplin and Kimber, 2004; Jones and Aplin, 2009; Genbacev et al., 2003; Kimber et al., 2001; Nejatbakhsh et al., 2012; Zhang et al., 2009; Lindenberg et al., 1988; Wang et al., 1998; Zhu et al., 1995). Le $\text{y}$  appears to have a role in embryo attachment after the clearance of mucin from the glycocalyx (Wang et al., 1998), including in the modulation of signalling through the epidermal growth factor receptor (EGFR) and/or mitogen-activated protein kinase (MAPK) pathway (Liu et al., 2012).

**Box 2: Demonstrating integrin function in implantation**

Function-inhibiting antibodies that target integrin  $\alpha v\beta 3$  or  $\alpha v\beta 8$  – both of which are expressed on trophoblast as well as on receptive phase epithelium – RGD peptide and knockdown of epithelial  $\alpha v\beta 3$  can reduce embryo attachment *in vitro* (Kaneko et al., 2011, 2013; 2014a) and *in vivo* (Illera et al., 2000, 2003; Kumar et al., 2015). This implies an interaction between integrin  $\alpha v$  and an extracellular bridging ligand (see poster) regarding attachment (Singh and Aplin, 2009). Both *in vivo* (Johnson et al., 2014; Liu et al., 2013) and *in vitro* (Kang et al., 2014) evidence supports a role for osteopontin (OPN) in embryo attachment to epithelium. Another candidate is fibronectin, a specific glycoform of which is produced by trophoblast (Kaneko et al., 2013; Shimomura et al., 2006; Turpeenniemi-Hujanen et al., 1995). However, despite these data, implantation is not impaired when any of the above proteins are knocked out (Bouvard et al., 2001).

Function-inhibition experiments *in vivo* are often set up to assay the outcome some days after the intervention, a design that does not reveal the stage(s) of the implantation cascade that are inhibited. It may be that there is a complex interplay between integrins and other cell surface factors. Indeed, a number of components of the uterine cell surface have functional roles in implantation and interact with  $\alpha v$  integrins, including CD98 (officially known as SLC3A2) (Domínguez et al., 2010), the tetraspanin CD9 (Domínguez et al., 2010; Liu et al., 2006; Wynne et al., 2006), the dipeptidyl peptidase CD26 (officially known as DPP4) (Shimomura et al., 2006), the epidermal growth factor (EGF)-domain-containing glycoprotein MFG-E8 (Schmitz et al., 2014), the IGF receptor (Fujita et al., 2013; Kang et al., 2015), galectin 3 (Lei et al., 2009; Yang et al., 2012) and galectin 15 (Lewis et al., 2007).

An attractive suggestion is that a supramolecular glycosynapse at the cell surface that comprises integrins, tetraspanins, glycolipids and other components (Mitsuzuka et al., 2005) enables  $\alpha v$  integrins to act cooperatively (Manninen, 2015). Therefore, disruption of integrins or their blocking by antibody occupancy could disable these multimolecular complexes, whereas following genetic deletions these other components are still functioning, allowing implantation to take place. Studies using model organisms show that developmentally initiated compensatory changes in gene networks can buffer deleterious mutations in ways that may not be possible after translational or transcriptional knockdown (Rossi et al., 2015).

that lack leukemia inhibitory factor (LIF), in which arrest occurs at the attachment stage (Stewart et al., 1992; Fouladi-Nashta et al., 2005; Rosario et al., 2014). LIF is released from uterine glands and diffuses to activate receptors in luminal epithelial cells, leading to Stat3-mediated signalling and a profound shift in gene expression (Rosario et al., 2014). Consistent with this, the defective development of the postnatal gland in E-cadherin (Cdh1)-null, Hoxa11-null and Wnt7a-null mice all result in failure of implantation (Dunlap et al., 2011; Gendron et al., 1997; Reardon et al., 2012). Glandular epithelium is also important in humans as it secretes the histiotrophe, a mix of endometrial substrates that provides early support for the conceptus (Jones et al., 2010, 2015). Numerous other paracrine and/or juxtacrine mediators are active at implantation, such as activin A, calcitonin, chorionic gonadotrophin (CG), gonadotropin-releasing hormone (GnRH), glycodeilin, HB-EGF, insulin-like growth factors (IGF), IGF-binding protein 1, transforming growth factor (TGF) beta, other members of the BMP superfamily, trypsin-like enzymes, vascular endothelial growth factor, and others. The scope of this review does not permit their detailed discussion; for reviews see e.g. (Cha and Dey, 2014; Dey et al., 2004; Macklon and Brosens, 2014).

Rearrangement of epithelial apical–basal polarity has been posited as a change that may allow progression of implantation from attachment to invasion (Denker, 1993). In mouse, E-cadherin is reduced in luminal epithelium at attachment sites (Wallingford

et al., 2013); this suggests a remodelling of adherens junctions with loosening of lateral adhesion (Li et al., 2002; Paria et al., 1999; Thie et al., 1996). Uterine-specific ablation of Msx1 and Msx2 causes implantation failure, and the unchanged distribution of E-cadherin and claudin 1 in the luminal epithelium of the mutant mice suggests that retained apicolateral polarisation contributes to the phenotype (Daikoku et al., 2011; Sun et al., 2015, 2016).

Inactivation of uterine epithelial-specific Stat3 results in defects in epithelial polarity prior to implantation (Pawar et al., 2013). In addition, E-cadherin and several claudins that normally are downregulated at this stage are retained. Moreover, paracrine signalling from the epithelium to the subjacent stroma through ligands of epidermal growth factor receptor (EGFR) in order to initiate decidualisation is also impaired. Although not all the uterine changes associated with implantation are absent, this subset of functional impairments is still sufficient to render the mice infertile, with embryos failing to attach to the epithelium (Pawar et al., 2013). Loss of uterine Alk3, a receptor for ligands of the type I BMP family, abolishes the suppression of epithelial proliferative activity that normally occurs at the time of implantation. There is an increased density of epithelial microvilli and maintenance of apical cell polarity, leading to sterility. Downstream of BMP signalling, Smad4 and Pgr both regulate Klf15, which in turn regulates epithelial proliferation, illustrating how steroid and growth factor pathways intersect (Monsivais et al., 2016).

The ERM proteins ezrin, moesin and radixin link actin to the apical plasma membrane (Martin et al., 2000). At the time of receptivity, the serine protease proprotein convertase 6 (PC6, officially known as PCSK5) cleaves ERM-binding phosphoprotein 50 (EBP50; also known as SLC9A3R1), which tethers ezrin to the membrane (see poster). PC6 knockdown stabilises membrane localisation of ERMs, thereby preventing a rearrangement of the apical microfilament web during the transition to receptivity. Proprotein convertases are generally associated with secretory pathways; PC6 has plasma membrane targets, including integrin  $\alpha$  chains and dystroglycan, and it is not known how PC6 enters the cytoplasmic compartment. As its absence dramatically impairs implantation, it might act as a general proteolytic regulator of receptivity (Heng et al., 2011).

Active Rac1 is concentrated near the mouse apical luminal epithelial surface on days 4 and 5 only (see poster). Depletion of uterine Rac1, which impairs receptivity (Tu et al., 2015), shifts the timing of alterations to the polarised epithelial phenotype with a reduction in the abundance of apical actin and of the cell junctional components PAR3 (also known as PARD3), occludin and claudin 7. Immunoreactivity to E-cadherin also appears increased, perhaps because it is concentrated in a shorter lateral domain. Rac1 functions through the serine/threonine kinase Pak1 to regulate ERM phosphorylation, and also signals through p38 MAPK (officially known as MAPK14) to mediate TNF $\alpha$ -induced uterine epithelial degeneration post implantation.

Cytoplasmic Ca<sup>2+</sup> also has a role in the epithelium as revealed by the finding that intrauterine injection of morpholino-oligonucleotides targeting the cytoplasmic Ca<sup>2+</sup>-binding protein calbindin-d28k (officially known as CALB1) in mice that are genetically deficient in CaBPd9k (officially known as S100G), another calbindin, leads to failure of implantation, whereas treated WT mice and untreated CaBP-d28k-null mice are both fertile (Luu et al., 2004).

Micro RNAs (miRs) modulate gene expression and epithelial-embryo communication during the peri-implantation period. Attached or closely apposed embryos internalise microvesicles

and/or exosomes that are released by endometrial epithelial cells. The encapsulated miRs include Hsa-miR-30d, which targets a group of adhesion molecules in the blastocyst and increases the levels of integrins  $\beta 3$  and  $\alpha 7$ , and cadherin 5. Accordingly, embryos that express miR-30d display increased adhesion to epithelial cells *in vitro* (Vilella et al., 2015). By contrast, there is evidence that a skewed miR profile in epithelial cells can impair receptivity (Kang et al., 2015).

### Conclusions and perspectives

Painstaking analysis of the morphology of trophoblast-epithelium interactions in successive temporal stages of implantation in laboratory animals, coupled with emerging data from mice that carry gene ablations, are beginning to reveal the cellular and molecular pathways involved. In particular, uterine epithelial-specific conditional ablation by using the Wnt7a-Cre mouse is a strong addition to the repertoire of tools (Winuthayanon et al., 2010). Transformation of the apical plasma membrane occurs with reorganisation of the underlying cytoskeleton, loss of glycocalyx and a reduction of epithelial polarity. Signalling responses are then generated that activate underlying stromal cells to decidualise, and this differentiation takes place from trophoblast to form primary trophoblast giant cells. However, much remains to be discovered about the interactions that mediate trophoblast-epithelium adhesion. Following these initial interactions, epithelial cells throughout the implantation chamber and in adjacent areas then undergo coordinated cell death in order to generate a direct interface between TGC and uterine stroma. Several transcription factors and signalling nodes control downstream events.

In humans, initial attachment of the trophoblast occurs to the glycocalyx. Here, embryonic signalling to initiate decidualisation in the stroma is not required. Primary syncytial cells differentiate from trophoblast at adhesion to epithelium, and these mediate initiation of invasion. A minimal area of the maternal epithelium is displaced and, after the embryo has become established in the stroma, the epithelium seals over. *In vitro* models will be important for drug development to improve rates of implantation after *in vitro* fertilisation. It remains to be seen how important the molecular pathways that have been identified in mouse are in humans. Future work will delineate how signals and structures in the 3D maternal environment specify the ongoing developmental events that create a 3D endometrial-placental-embryonic interface.

### Competing interests

The authors declare no competing or financial interests.

### Funding

The authors acknowledge grant support from WellBeing of Women [grant number: RG1442] and Diabetes UK [grant number: 15/0005207].

### Cell science at a glance

A high-resolution version of the poster and individual poster panels are available for downloading at <http://jcs.biologists.org/lookup/doi/10.1242/jcs.175943>. supplemental

### References

Aplin, J. D. (2006). Embryo implantation: the molecular mechanism remains elusive. *Reprod. Biomed. Online* **13**, 833–839.

Aplin, J. D. and Jones, C. J. (2012). Fucose, placental evolution and the glycode. *Glycobiology* **22**, 470–478.

Aplin, J. D. and Kimber, S. J. (2004). Trophoblast-uterine interactions at implantation. *Reprod. Biol. Endocrinol.* **2**, 48.

Aplin, J. D., Meseguer, M., Simon, C., Ortíz, M. E., Croxatto, H. and Jones, C. J. P. (2001). MUC1, glycans and the cell-surface barrier to embryo implantation. *Biochem. Soc. Trans.* **29**, 153–156.

Bazer, F. W., Spencer, T. E., Johnson, G. A., Burghardt, R. C. and Wu, G. (2009). Comparative aspects of implantation. *Reproduction* **138**, 195–209.

Bentin-Ley, U., Pedersen, B., Lindenberg, S., Larsen, J. F., Hamberger, L. and Horn, T. (1994). Isolation and culture of human endometrial cells in a three-dimensional culture system. *J. Reprod. Fertil.* **101**, 327–332.

Boggavarapu, N. R., Berger, C., von Grothusen, C., Menezes, J., Gemzell-Danielsson, K. and Lalitkumar, P. G. (2016). Effects of low doses of mifepristone on human embryo implantation process in a three-dimensional human endometrial *in vitro* co-culture system. *Contraception* **94**, 143–151.

Bouvard, D., Brakebusch, C., Gustafsson, E., Aszodi, A., Bengtsson, T., Berna, A. and Fassler, R. (2001). Functional consequences of integrin gene mutations in mice. *Circ. Res.* **89**, 211–223.

Brosens, J. J., Salker, M. S., Teklenburg, G., Nautiyal, J., Salter, S., Lucas, E. S., Steel, J. H., Christian, M., Chan, Y.-W., Boomsma, C. M. et al. (2014). Uterine selection of human embryos at implantation. *Sci. Rep.* **4**, 3894.

Campbell, S., Swann, H. R., Seif, M. W., Kimber, S. J. and Aplin, J. D. (1995). Cell adhesion molecules on the oocyte and preimplantation human embryo. *Hum. Reprod.* **10**, 1571–1578.

Cha, J. and Dey, S. K. (2014). Cadence of procreation: orchestrating embryo-uterine interactions. *Semin. Cell Dev. Biol.* **34**, 56–64.

Cha, J., Sun, X. and Dey, S. K. (2012). Mechanisms of implantation: strategies for successful pregnancy. *Nat. Med.* **18**, 1754–1767.

Cha, J., Bartos, A., Park, C., Sun, X., Li, Y., Cha, S.-W., Ajima, R., Ho, H.-Y. H., Yamaguchi, T. P. and Dey, S. K. (2014). Appropriate crypt formation in the uterus for embryo homing and implantation requires Wnt5a-ROR signaling. *Cell Rep.* **8**, 382–392.

Chaen, T., Konno, T., Egashira, M., Bai, R., Nomura, N., Nomura, S., Hirota, Y., Sakurai, T. and Imakawa, K. (2012). Estrogen-dependent uterine secretion of osteopontin activates blastocyst adhesion competence. *PLoS ONE* **7**, e48933.

Daikoku, T., Cha, J., Sun, X., Tranguch, S., Xie, H., Fujita, T., Hirota, Y., Lydon, J., DeMayo, F., Maxson, R. et al. (2011). Conditional deletion of Msx homeobox genes in the uterus inhibits blastocyst implantation by altering uterine receptivity. *Dev. Cell* **21**, 1014–1025.

Deglincerti, A., Croft, G. F., Pietila, L. N., Zernicka-Goetz, M., Siggia, E. D. and Brivanlou, A. H. (2016). Self-organization of the *in vitro* attached human embryo. *Nature* **533**, 251–254.

Denker, H. W. (1993). Implantation: a cell biological paradox. *J. Exp. Zool.* **266**, 541–558.

Dey, S. K., Lim, H., Das, S. K., Reese, J., Paria, B. C., Daikoku, T. and Wang, H. (2004). Molecular cues to implantation. *Endocr. Rev.* **25**, 341–373.

Dharmaraj, N., Chapela, P. J., Morgado, M., Hawkins, S. M., Lessey, B. A., Young, S. L. and Carson, D. D. (2014). Expression of the transmembrane mucins, MUC1, MUC4 and MUC16, in normal endometrium and in endometriosis. *Hum. Reprod.* **29**, 1730–1738.

Díaz-Gimeno, P., Ruíz-Alonso, M., Blesa, D. and Simón, C. (2014). Transcriptomics of the human endometrium. *Int. J. Dev. Biol.* **58**, 127–137.

Dockery, P. and Burke, M. (2008). The fine structure of the mature human endometrium. In *The Endometrium* (ed. J. D. Aplin, A. T. Fazleabas, S. R. Glasser and L. C. Giudice), pp. 46–65. London, UK: Informa Healthcare.

Dominguez, F., Simón, C., Quiñero, A., Ramirez, M. A., González-Muñoz, E., Burghardt, H., Cervero, A., Martínez, S., Pellicer, A., Palacín, M. et al. (2010). Human endometrial CD98 is essential for blastocyst adhesion. *PLoS ONE* **5**, e13380.

Dunlap, K. A., Filant, J., Hayashi, K., Rucker, E. B., III, Song, G., Deng, J. M., Behringer, R. R., DeMayo, F. J., Lydon, J., Jeong, J.-W. et al. (2011). Postnatal deletion of Wnt7a inhibits uterine gland morphogenesis and compromises adult fertility in mice. *Biol. Reprod.* **85**, 386–396.

Fouladi-Nashta, A. A., Jones, C. J. P., Nijjar, N., Mohamet, L., Smith, A., Chambers, I. and Kimber, S. J. (2005). Characterization of the uterine phenotype during the peri-implantation period for LIF-null, MF1 strain mice. *Dev. Biol.* **281**, 1–21.

Fujita, M., Takada, Y. K. and Takada, Y. (2013). Insulin-like growth factor (IGF) signaling requires alphavbeta3-IGF1-IGF type 1 receptor (IGF1R) ternary complex formation in anchorage independence, and the complex formation does not require IGF1R and Src activation. *J. Biol. Chem.* **288**, 3059–3069.

Fukuda, M. N. and Sugihara, K. (2008). An integrated view of L-selectin and trophinin function in human embryo implantation. *J. Obstet. Gynaecol. Res.* **34**, 129–136.

Fukuda, M. N. and Sugihara, K. (2012). Trophinin in cell adhesion and signal transduction. *Front. Biosci.* **4**, 342–350.

Fukuda, M. N., Sugihara, K. and Nakayama, J. (2008). Trophinin: what embryo implantation teaches us about human cancer. *Cancer Biol. Ther.* **7**, 1165.

Gellersen, B. and Brosens, J. J. (2014). Cyclic decidualization of the human endometrium in reproductive health and failure. *Endocr. Rev.* **35**, 851–905.

Genbacev, O. D., Prakovphol, A., Foulk, R. A., Krtolica, A. R., Ilic, D., Singer, M. S., Yang, Z. Q., Kiessling, L. L., Rosen, S. D. and Fisher, S. J. (2003). Trophoblast L-selectin-mediated adhesion at the maternal-fetal interface. *Science* **299**, 405–408.

- Gendron, R. L., Paradis, H., Hsieh-Li, H. M., Lee, D. W., Potter, S. S. and Markoff, E. (1997). Abnormal uterine stromal and glandular function associated with maternal reproductive defects in Hoxa-11 null mice. *Biol. Reprod.* **56**, 1097–1105.
- Gipson, I. K., Blalock, T., Tisdale, A., Spurr-Michaud, S., Allcorn, S., Stavreus-Evers, A. and Gemzell, K. (2008). MUC16 is lost from the uterodome (pinopode) surface of the receptive human endometrium: in vitro evidence that MUC16 is a barrier to trophoblast adherence. *Biol. Reprod.* **78**, 134–142.
- Hannan, N. J., Paiva, P., Dimitriadis, E. and Salamonsen, L. A. (2009). Models for study of human embryo implantation: choice of cell lines? *Biol. Reprod.* **82**, 235–245.
- Heng, S., Cervero, A., Simon, C., Stephens, A. N., Li, Y., Zhang, J., Paule, S., Rainczuk, A., Singh, H., Quinonero, A. et al. (2011). Proprotein convertase 5/6 is critical for embryo implantation in women: regulating receptivity by cleaving EBP50, modulating ezrin binding, and membrane-cytoskeletal interactions. *Endocrinology* **152**, 5041–5052.
- Heng, S., Paule, S. G., Li, Y., Rombauts, L. J., Vollenhoven, B., Salamonsen, L. A. and Nie, G. (2015). Posttranslational removal of alpha-dystroglycan N terminus by PC5/6 cleavage is important for uterine preparation for embryo implantation in women. *FASEB J.* **29**, 4011–4022.
- Hertig, A. T., Rock, J. and Adams, E. C. (1956). A description of 34 human ova within the first 17 days of development. *Am. J. Anat.* **98**, 435–493.
- Hirate, Y., Suzuki, H., Kawasumi, M., Takase, H. M., Igarashi, H., Naquet, P., Kanai, Y. and Kanai-Azuma, M. (2016). Mouse Sox17 haploinsufficiency leads to female subfertility due to impaired implantation. *Sci. Rep.* **6**, 24171.
- Igakura, T., Kadomatsu, K., Kaname, T., Muramatsu, H., Fan, Q.-W., Miyauchi, T., Toyama, Y., Kuno, N., Yuasa, S., Takahashi, M. et al. (1998). A null mutation in basigin, an immunoglobulin superfamily member, indicates its important roles in peri-implantation development and spermatogenesis. *Dev. Biol.* **194**, 152–165.
- Illera, M. J., Cullinan, E., Gui, Y., Yuan, L., Beyler, S. A. and Lessey, B. A. (2000). Blockade of the alpha(v)beta(3) integrin adversely affects implantation in the mouse. *Biol. Reprod.* **62**, 1285–1290.
- Illera, M. J., Lorenzo, P. L., Gui, Y. T., Beyler, S. A., Apparao, K. B. and Lessey, B. A. (2003). A role for alphavbeta3 integrin during implantation in the rabbit model. *Biol. Reprod.* **68**, 766–771.
- Johnson, G. A., Burghardt, R. C. and Bazer, F. W. (2014). Osteopontin: a leading candidate adhesion molecule for implantation in pigs and sheep. *J. Anim. Sci. Biotechnol.* **5**, 56.
- Jones, C. J. P. and Aplin, J. D. (2009). Glycosylation at the fetomaternal interface: does the glycodecode play a critical role in implantation? *Glycoconj. J.* **26**, 359–366.
- Jones, C. J. P., Aplin, J. D. and Burton, G. J. (2010). First trimester histiotrophe shows altered sialylation compared with secretory phase glycoconjugates in human endometrium. *Placenta* **31**, 576–580.
- Jones, C. J. P., Choudhury, R. H. and Aplin, J. D. (2015). Tracking nutrient transfer at the human maternofetal interface from 4 weeks to term. *Placenta* **36**, 372–380.
- Joswig, A., Gabriel, H. D., Kibschull, M. and Winterhager, E. (2003). Apoptosis in uterine epithelium and decidua in response to implantation: evidence for two different pathways. *Reprod. Biol. Endocrinol.* **1**, 44.
- Julian, J., Dharmaraj, N. and Carson, D. D. (2009). MUC1 is a substrate for gamma-secretase. *J. Cell. Biochem.* **108**, 802–815.
- Kaneko, Y., Day, M. L. and Murphy, C. R. (2011). Integrin beta3 in rat blastocysts and epithelial cells is essential for implantation in vitro: studies with Ishikawa cells and small interfering RNA transfection. *Hum. Reprod.* **26**, 1665–1674.
- Kaneko, Y., Murphy, C. R. and Day, M. L. (2013). Extracellular matrix proteins secreted from both the endometrium and the embryo are required for attachment: a study using a co-culture model of rat blastocysts and Ishikawa cells. *J. Morphol.* **274**, 63–72.
- Kang, Y.-J., Forbes, K., Carver, J. and Aplin, J. D. (2014). The role of the osteopontin-integrin alphavbeta3 interaction at implantation: functional analysis using three different in vitro models. *Hum. Reprod.* **29**, 739–749.
- Kang, Y.-J., Lees, M., Matthews, L. C., Kimber, S. J., Forbes, K. and Aplin, J. D. (2015). miR-145 suppresses embryo-epithelial juxtacrine communication at implantation by modulating maternal IGF1R. *J. Cell Sci.* **128**, 804–814.
- Kim, S. W., Yang, H. G., Kang, M. C., Lee, S., Namkoong, H., Lee, S. W. and Sung, Y. C. (2014). KIAA1114, a full-length protein encoded by the trophinin gene, is a novel surface marker for isolating tumor-initiating cells of multiple hepatocellular carcinoma subtypes. *Oncotarget* **5**, 1226–1240.
- Kimber, S. J., Stones, R. E. and Sidhu, S. S. (2001). Glycosylation changes during differentiation of the murine uterine epithelium. *Biochem. Soc. Trans.* **29**, 156–162.
- Koot, Y. E. M., Boomsma, C. M., Eijkemans, M. J. C., Lentjes, E. G. W. and Macklon, N. S. (2011). Recurrent pre-clinical pregnancy loss is unlikely to be a 'cause' of unexplained infertility. *Hum. Reprod.* **26**, 2636–2641.
- Kumar, V., Maurya, V. K., Joshi, A., Meeran, S. M. and Jha, R. K. (2015). Integrin beta 8 (ITGB8) regulates embryo implantation potentially via controlling the activity of TGF-B1 in mice. *Biol. Reprod.* **92**, 109.
- Kuno, N., Kadomatsu, K., Fan, Q.-W., Hagihara, M., Senda, T., Mizutani, S. and Muramatsu, T. (1998). Female sterility in mice lacking the basigin gene, which encodes a transmembrane glycoprotein belonging to the immunoglobulin superfamily. *FEBS Lett.* **425**, 191–194.
- Kupka, M. S., Ferraretti, A. P., de Mouzon, J., Erb, K., D'Hooghe, T., Castilla, J. A., Calhaz-Jorge, C., De Geyter, C., Goossens, V. and Strohmer, H. (2014). Assisted reproductive technology in Europe, 2010: results generated from European registers by ESHREdagger. *Hum. Reprod.* **29**, 2099–2113.
- Lalitkumar, S., Boggavarapu, N. R., Menezes, J., Dimitriadis, E., Zhang, J. G., Nicola, N. A., Gemzell-Danielsson, K. and Lalitkumar, L. P. (2013). Polyethylene glycated leukemia inhibitory factor antagonist inhibits human blastocyst implantation and triggers apoptosis by down-regulating embryonic AKT. *Fertil. Steril.* **100**, 1160–1169.
- Lee, C.-L., Lam, M. P. Y., Lam, K. K. W., Leung, C. O. N., Pang, R. T. K., Chu, I. K., Wan, T. H. L., Chai, J., Yeung, W. S. B. and Chiu, P. C. N. (2013). Identification of CD147 (basigin) as a mediator of trophoblast functions. *Hum. Reprod.* **28**, 2920–2929.
- Lee, Y.-L., Fong, S.-W., Chen, A. C. H., Li, T., Yue, C., Lee, C.-L., Ng, E. H. Y., Yeung, W. S. B. and Lee, K.-F. (2015). Establishment of a novel human embryonic stem cell-derived trophoblastic spheroid implantation model. *Hum. Reprod.* **30**, 2614–2626.
- Lei, C.-X., Zhang, W., Zhou, J.-P. and Liu, Y.-K. (2009). Interactions between galectin-3 and integrinbeta3 in regulating endometrial cell proliferation and adhesion. *Hum. Reprod.* **24**, 2879–2889.
- Lewis, S. K., Farmer, J. L., Burghardt, R. C., Newton, G. R., Johnson, G. A., Adelson, D. L., Bazer, F. W. and Spencer, T. E. (2007). Galectin 15 (LGALS15): a gene uniquely expressed in the uteri of sheep and goats that functions in trophoblast attachment. *Biol. Reprod.* **77**, 1027–1036.
- Li, Q., Wang, J., Armant, D. R., Bagchi, M. K. and Bagchi, I. C. (2002). Calcitonin down-regulates E-cadherin expression in rodent uterine epithelium during implantation. *J. Biol. Chem.* **277**, 46447–46455.
- Li, Y., Sun, X. and Dey, S. K. (2015). Entosis allows timely elimination of the luminal epithelial barrier for embryo implantation. *Cell Rep.* **11**, 358–365.
- Lim, H. J. and Dey, S. K. (2009). HB-EGF: a unique mediator of embryo-uterine interactions during implantation. *Exp. Cell Res.* **315**, 619–626.
- Lindenberg, S., Sundberg, K., Kimber, S. J. and Lundblad, A. (1988). The milk oligosaccharide, lacto-N-fucopentaose I, inhibits attachment of mouse blastocysts on endometrial monolayers. *J. Reprod. Fertil.* **83**, 149–158.
- Lindsay, L. A. and Murphy, C. R. (2008). The cytoskeleton of uterine epithelial and stromal cells. In *The Endometrium. Molecular, cellular and Clinical Perspectives* (ed. J. D. Aplin, A. T. Fazleabas, S. R. Glasser and L. C. Giudice), pp. 66–75. London, UK: Informa Helathcare.
- Liu, W. M., Cao, Y. J., Yang, Y. J., Li, J., Hu, Z. and Duan, E. K. (2006). Tetraspanin CD9 regulates invasion during mouse embryo implantation. *J. Mol. Endocrinol.* **36**, 121–130.
- Liu, S., Yang, X., Wang, J., Wei, J., Zhang, D., Wang, X. and Yan, Q. (2012). Differential expression of LeY and fucosyltransferase IV correlates with the receptivity of RL95-2 and HEC-1A human uterine epithelial cells. *Cell Biol. Int.* **36**, 469–474.
- Liu, N., Zhou, C., Chen, Y. and Zhao, J. (2013). The involvement of osteopontin and beta3 integrin in implantation and endometrial receptivity in an early mouse pregnancy model. *Eur. J. Obstet. Gynecol. Reprod. Biol.* **170**, 171–176.
- Lopata, A., Bentin-Ley, U. and Enders, A. (2002). "Pinopodes" and implantation. *Rev. Endocr. Metab. Disord.* **3**, 77–86.
- Luu, K. C., Nie, G. Y. and Salamonsen, L. A. (2004). Endometrial calbindins are critical for embryo implantation: evidence from in vivo use of morpholino antisense oligonucleotides. *Proc. Natl. Acad. Sci. USA* **101**, 8028–8033.
- Luxford, K. A. and Murphy, C. R. (1992). Changes in the apical microfilaments of rat uterine epithelial cells in response to estradiol and progesterone. *Anat. Rec.* **233**, 521–526.
- Macklon, N. S. and Brosens, J. J. (2014). The human endometrium as a sensor of embryo quality. *Biol. Reprod.* **91**, 98.
- Manninen, A. (2015). Epithelial polarity-generating and integrating signals from the ECM with integrins. *Exp. Cell Res.* **334**, 337–349.
- Martel, D., Monier, M. N., Roche, D. and Psychoyos, A. (1991). Hormonal dependence of pinopode formation at the uterine luminal surface. *Hum. Reprod.* **6**, 597–603.
- Martín, J. C., Jasper, M. J., Valbuena, D., Meseguer, M., Remohi, J., Pellicer, A. and Simon, C. (2000). Increased adhesiveness in cultured endometrial-derived cells is related to the absence of moesin expression. *Biol. Reprod.* **63**, 1370–1376.
- Meseguer, M., Aplin, J. D., Caballero-Campo, P., O'Connor, J. E., Martín, J. C., Remohi, J., Pellicer, A. and Simon, C. (2001). Human endometrial mucin MUC1 is up-regulated by progesterone and down-regulated in vitro by the human blastocyst. *Biol. Reprod.* **64**, 590–601.
- Mitsuzuka, K., Handa, K., Satoh, M., Arai, Y. and Hakomori, S. (2005). A specific microdomain ("glycosynapse 3") controls phenotypic conversion and reversion of bladder cancer cells through GM3-mediated interaction of alpha3beta1 integrin with CD9. *J. Biol. Chem.* **280**, 35545–35553.
- Monsivais, D., Clementi, C., Peng, J., Titus, M. M., Barrish, J. P., Creighton, C. J., Lydon, J. P., DeMayo, F. J. and Matzuk, M. M. (2016). Uterine ALK3 is essential during the window of implantation. *Proc. Natl. Acad. Sci. USA* **113**, E387–E395.
- Mossman, H. W. (1987). *Vertebrate Fetal Membranes*. New Jersey: Rutgers University Press.
- Murphy, C. R. (2004). Uterine receptivity and the plasma membrane transformation. *Cell Res.* **14**, 259–267.

- Nadano, D., Sugihara, K., Paria, B. C., Saburi, S., Copeland, N. G., Gilbert, D. J., Jenkins, N. A., Nakayama, J. and Fukuda, M. N. (2002). Significant differences between mouse and human trophinins are revealed by their expression patterns and targeted disruption of mouse trophinin gene. *Biol. Reprod.* **66**, 313–321.
- Nejatbakhsh, R., Kabir-Salmani, M., Dimitriadis, E., Hosseini, A., Taheripana, R., Sadeghi, Y., Akimoto, Y. and Iwashita, M. (2012). Subcellular localization of L-selectin ligand in the endometrium implies a novel function for pinopodes in endometrial receptivity. *Reprod. Biol. Endocrinol.* **10**, 46.
- Noguchi, Y., Sato, T., Hirata, M., Hara, T., Ohama, K. and Ito, A. (2003). Identification and characterization of extracellular matrix metalloproteinase inducer in human endometrium during the menstrual cycle in vivo and in vitro. *J. Clin. Endocrinol. Metab.* **88**, 6063–6072.
- Paria, B. C., Lim, H., Wang, X. N., Liehr, J., Das, S. K. and Dey, S. K. (1998). Coordination of differential effects of primary estrogen and catecholesterogen on two distinct targets mediates embryo implantation in the mouse. *Endocrinology* **139**, 5235–5246.
- Paria, B. C., Zhao, X., Das, S. K., Dey, S. K. and Yoshinaga, K. (1999). Zonula occludens-1 and E-cadherin are coordinately expressed in the mouse uterus with the initiation of implantation and decidualization. *Dev. Biol.* **208**, 488–501.
- Parr, M. B. and Parr, E. L. (1989). The implantation reaction. In *Biology of the Uterus* (ed. R. M. Wynn and W. P. Jollie), pp. 233–277. New York: Plenum.
- Pawar, S., Starosvetsky, E., Orvis, G. D., Behringer, R. R., Bagchi, I. C. and Bagchi, M. K. (2013). STAT3 regulates uterine epithelial remodeling and epithelial-stromal crosstalk during implantation. *Mol. Endocrinol.* **27**, 1996–2012.
- Potts, D. M. (1968). The ultrastructure of implantation in the mouse. *J. Anat.* **103**, 77–90.
- Qu, T., Zhang, S. M., Yu, L. L., Zhang, S., Yuan, D. Z., Xu, Q., Zhang, J. H., He, Y. P. and Yue, L. M. (2015). Relocalisation and activation of integrins induced rapidly by oestrogen via G-protein-coupled receptor 30 in mouse blastocysts. *Reprod. Fertil. Dev.* **28**, 1679–1685.
- Quenby, S., Vince, G., Farquharson, R. and Aplin, J. (2002). Recurrent miscarriage: a defect in nature's quality control? *Hum. Reprod.* **17**, 1959–1963.
- Quinn, C. E. and Casper, R. F. (2009). Pinopodes: a questionable role in endometrial receptivity. *Hum. Reprod. Update* **15**, 229–236.
- Reardon, S. N., King, M. L., MacLean, J. A., II, Mann, J. L., DeMayo, F. J., Lydon, J. P. and Hayashi, K. (2012). CDH1 is essential for endometrial differentiation, gland development, and adult function in the mouse uterus. *Biol. Reprod.* **86**, 141, 1–10.
- Rodriguez, A., Tripurani, S. K., Burton, J. C., Clementi, C., Larina, I. and Pangas, S. A. (2016). SMAD signaling is required for structural integrity of the female reproductive tract and uterine function during early pregnancy in mice. *Biol. Reprod.* **95**, 44.
- Rosario, G. X., Hondo, E., Jeong, J.-W., Mutalif, R., Ye, X., Yee, L. X. and Stewart, C. L. (2014). The LIF-mediated molecular signature regulating murine embryo implantation. *Biol. Reprod.* **91**, 66.
- Rossi, A., Kontarakis, Z., Gerri, C., Nolte, H., Holper, S., Kruger, M. and Stainier, D. Y. (2015). Genetic compensation induced by deleterious mutations but not gene knockdowns. *Nature* **524**, 230–233.
- Ruan, Y. C., Guo, J. H., Liu, X., Zhang, R., Tsang, L. L., Dong, J. D., Chen, H., Yu, M. K., Jiang, X., Zhang, X. H. et al. (2012). Activation of the epithelial Na<sup>+</sup> channel triggers prostaglandin E<sub>2</sub> release and production required for embryo implantation. *Nat. Med.* **18**, 1112–1117.
- Salker, M. S., Christian, M., Steel, J. H., Nautiyal, J., Lavery, S., Trew, G., Webster, Z., Al-Sabbagh, M., Puchchakayala, G., Föller, M. et al. (2011). Deregulation of the serum- and glucocorticoid-inducible kinase SGK1 in the endometrium causes reproductive failure. *Nat. Med.* **17**, 1509–1513.
- Schlafke, S. and Enders, A. C. (1975). Cellular basis of interaction between trophoblast and uterus at implantation. *Biol. Reprod.* **12**, 41–65.
- Schmitz, C., Yu, L., Bocca, S., Anderson, S., Cunha-Filho, J. S., Rhavi, B. S. and Oehninger, S. (2014). Role for the endometrial epithelial protein MFG-E8 and its receptor integrin alphavbeta3 in human implantation: results of an in vitro trophoblast attachment study using established human cell lines. *Fertil. Steril.* **101**, 874–882.
- Schultz, J. F. and Armant, D. R. (1995). Beta 1- and beta 3-class integrins mediate fibronectin binding activity at the surface of developing mouse peri-implantation blastocysts. Regulation by ligand-induced mobilization of stored receptor. *J. Biol. Chem.* **270**, 11522–11531.
- Schultz, J. F., Mayernik, L., Rout, U. K. and Armant, D. R. (1997). Integrin trafficking regulates adhesion to fibronectin during differentiation of mouse peri-implantation blastocysts. *Dev. Genet.* **21**, 31–43.
- Shahbazi, M. N., Jedrusik, A., Vuoristo, S., Recher, G., Hupalowska, A., Bolton, V., Fogarty, N. M. E., Campbell, A., Devito, L. G., Ilic, D. et al. (2016). Self-organization of the human embryo in the absence of maternal tissues. *Nat. Cell Biol.* **18**, 700–708.
- Shimomura, Y., Ando, H., Furugori, K., Kajiyama, H., Suzuki, M., Iwase, A., Mizutani, S. and Kikkawa, F. (2006). Possible involvement of crosstalk cell-adhesion mechanism by endometrial CD26/dipeptidyl peptidase IV and embryonal fibronectin in human blastocyst implantation. *Mol. Hum. Reprod.* **12**, 491–495.
- Singh, H. and Aplin, J. D. (2009). Adhesion molecules in endometrial epithelium: tissue integrity and embryo implantation. *J. Anat.* **215**, 3–13.
- Singh, H. and Aplin, J. D. (2015). Endometrial apical glycoproteomic analysis reveals roles for cadherin 6, desmoglein-2 and plexin b2 in epithelial integrity. *Mol. Hum. Reprod.* **21**, 81–94.
- Singh, H., Nardo, L., Kimber, S. J. and Aplin, J. D. (2010). Early stages of implantation as revealed by an in vitro model. *Reproduction* **139**, 905–914.
- Stephens, L. E., Sutherland, A. E., Klimanskaya, I. V., Andrieux, A., Meneses, J., Pedersen, R. A. and Damsky, C. H. (1995). Deletion of beta 1 integrins in mice results in inner cell mass failure and peri-implantation lethality. *Genes Dev.* **9**, 1883–1895.
- Stewart, C. L., Kaspar, P., Brunet, L. J., Bhatt, H., Gadi, I., Köntgen, F. and Abbondanzo, S. J. (1992). Blastocyst implantation depends on maternal expression of leukaemia inhibitory factor. *Nature* **359**, 76–79.
- Sugihara, K., Sugiyama, D., Byrne, J., Wolf, D. P., Lowitz, K. P., Kobayashi, Y., Kabir-Salmani, M., Nadano, D., Aoki, D., Nozawa, S. et al. (2007). Trophoblast cell activation by trophinin ligation is implicated in human embryo implantation. *Proc. Natl. Acad. Sci. USA* **104**, 3799–3804.
- Sun, X., Zhang, L., Xie, H., Wan, H., Magella, B., Whitsett, J. A. and Dey, S. K. (2012). Kruppel-like factor 5 (KLF5) is critical for conferring uterine receptivity to implantation. *Proc. Natl. Acad. Sci. USA* **109**, 1145–1150.
- Sun, X., Park, C. B., Deng, W., Potter, S. S. and Dey, S. K. (2015). Uterine inactivation of muscle segment homeobox (Msx) genes alters epithelial cell junction proteins during embryo implantation. *FASEB J.* **30**, 1425–1435.
- Sun, X., Park, C. B., Deng, W., Potter, S. S. and Dey, S. K. (2016). Uterine inactivation of muscle segment homeobox (Msx) genes alters epithelial cell junction proteins during embryo implantation. *FASEB J.* **30**, 1425–1435.
- Sutherland, A. E., Calarco, P. G. and Damsky, C. H. (1988). Expression and function of cell surface extracellular matrix receptors in mouse blastocyst attachment and outgrowth. *J. Cell Biol.* **106**, 1331–1348.
- Sutherland, A. E., Calarco, P. G. and Damsky, C. H. (1993). Developmental regulation of integrin expression at the time of implantation in the mouse embryo. *Development* **119**, 1175–1186.
- Tamura, N., Sugihara, K., Akama, T. O. and Fukuda, M. N. (2011). Trophinin-mediated cell adhesion induces apoptosis of human endometrial epithelial cells through PKC-delta. *Cell Cycle* **10**, 135–143.
- Thathiah, A. and Carson, D. D. (2004). MT1-MMP mediates MUC1 shedding independent of TACE/ADAM17. *Biochem. J.* **382**, 363–373.
- Thathiah, A., Blobel, C. P. and Carson, D. D. (2003). Tumor necrosis factor-alpha converting enzyme/ADAM 17 mediates MUC1 shedding. *J. Biol. Chem.* **278**, 3386–3394.
- Thie, M., Fuchs, P., Butz, S., Sieckmann, F., Hoshchutsky, H., Kemler, R. and Denker, H. W. (1996). Adhesiveness of the apical surface of uterine epithelial cells: the role of junctional complex integrity. *Eur. J. Cell Biol.* **70**, 221–232.
- Tu, Z., Wang, Q., Cui, T., Wang, J., Ran, H., Bao, H., Lu, J., Wang, B., Lydon, J. P., DeMayo, F. et al. (2015). Uterine RAC1 via Pak1-ERM signaling directs normal luminal epithelial integrity conducive to on-time embryo implantation in mice. *Cell Death Differ.* **23**, 169–181.
- Turpeenniemi-Hujanen, T., Feinberg, R. F., Kauppila, A. and Puistola, U. (1995). Extracellular matrix interactions in early human embryos: implications for normal implantation events. *Fertil. Steril.* **64**, 132–138.
- Vasquez, Y. M. and DeMayo, F. J. (2013). Role of nuclear receptors in blastocyst implantation. *Semin. Cell Dev. Biol.* **24**, 724–735.
- Vilella, F., Moreno-Moya, J. M., Balaguer, N., Grasso, A., Herrero, M., Martinez, S., Marciella, A. and Simon, C. (2015). Hsa-miR-30d, secreted by the human endometrium, is taken up by the pre-implantation embryo and might modify its transcriptome. *Development* **142**, 3210–3221.
- Wallingford, M. C., Angelo, J. R. and Mager, J. (2013). Morphogenetic analysis of peri-implantation development. *Dev. Dyn.* **242**, 1110–1120.
- Wang, J. and Armant, D. R. (2002). Integrin-mediated adhesion and signaling during blastocyst implantation. *Cells Tissues Organs* **172**, 190–201.
- Wang, H. and Dey, S. K. (2006). Roadmap to embryo implantation: clues from mouse models. *Nat. Rev. Genet.* **7**, 185–199.
- Wang, X. Q., Zhu, Z. M., Fenderson, B. A., Zeng, G. Q., Cao, Y. J. and Jiang, G. T. (1998). Effects of monoclonal antibody directed to LeY on implantation in the mouse. *Mol. Hum. Reprod.* **4**, 295–300.
- Wang, J., Mayernik, L. and Armant, D. R. (2007). Trophoblast adhesion of the peri-implantation mouse blastocyst is regulated by integrin signaling that targets phospholipase C. *Dev. Biol.* **302**, 143–153.
- Weimar, C. H. E., Post Uiterweer, E. D., Teklenburg, G., Heijnen, C. J. and Macklon, N. S. (2013). In-vitro model systems for the study of human embryo-endometrium interactions. *Reprod. Biomed. Online* **27**, 461–476.
- Welsh, A. O. and Enders, A. C. (1991). Chorionallantoic placenta formation in the rat: I. Luminal epithelial cell death and extracellular matrix modifications in the mesometrial region of implantation chambers. *Am. J. Anat.* **192**, 215–231.
- Wetendorf, M. and DeMayo, F. J. (2014). Progesterone receptor signaling in the initiation of pregnancy and preservation of a healthy uterus. *Int. J. Dev. Biol.* **58**, 95–106.

- Williamson, R. A., Henry, M. D., Daniels, K. J., Hrstka, R. F., Lee, J. C., Sunada, Y., Ibraghimov-Beskrovnaya, O. and Campbell, K. P.** (1997). Dystroglycan is essential for early embryonic development: disruption of Reichert's membrane in Dag1-null mice. *Hum. Mol. Genet.* **6**, 831–841.
- Winuthayanon, W., Hewitt, S. C., Orvis, G. D., Behringer, R. R. and Korach, K. S.** (2010). Uterine epithelial estrogen receptor alpha is dispensable for proliferation but essential for complete biological and biochemical responses. *Proc. Natl. Acad. Sci. USA* **107**, 19272–19277.
- Wynne, F., Ball, M., McLellan, A. S., Dockery, P., Zimmermann, W. and Moore, T.** (2006). Mouse pregnancy-specific glycoproteins: tissue-specific expression and evidence of association with maternal vasculature. *Reproduction* **131**, 721–732.
- Xiao, L.-J., Chang, H., Ding, N.-Z., Ni, H., Kadomatsu, K. and Yang, Z.-M.** (2002). Basigin expression and hormonal regulation in mouse uterus during the peri-implantation period. *Mol. Reprod. Dev.* **63**, 47–54.
- Xie, H., Wang, H., Tranguch, S., Iwamoto, R., Mekada, E., DeMayo, F. J., Lydon, J. P., Das, S. K. and Dey, S. K.** (2007). Maternal heparin-binding-EGF deficiency limits pregnancy success in mice. *Proc. Natl. Acad. Sci. USA* **104**, 18315–18320.
- Yang, H., Lei, C. and Zhang, W.** (2012). Expression of galectin-3 in mouse endometrium and its effect during embryo implantation. *Reprod. Biomed. Online* **24**, 116–122.
- Yelian, F. D., Yang, Y., Hirata, J. D., Schultz, J. F. and Armant, D. R.** (1995). Molecular interactions between fibronectin and integrins during mouse blastocyst outgrowth. *Mol. Reprod. Dev.* **41**, 435–448.
- Zhang, Y., Liu, S., Liu, Y., Wang, Z., Wang, X. and Yan, Q.** (2009). Overexpression of fucosyltransferase VII (FUT7) promotes embryo adhesion and implantation. *Fertil. Steril.* **91**, 908–914.
- Zhang, S., Lin, H., Kong, S., Wang, S., Wang, H. and Armant, D. R.** (2013). Physiological and molecular determinants of embryo implantation. *Mol. Aspects Med.* **34**, 939–980.
- Zhu, Z. M., Kojima, N., Stroud, M. R., Hakomori, S. and Fenderson, B. A.** (1995). Monoclonal antibody directed to Le(y) oligosaccharide inhibits implantation in the mouse. *Biol. Reprod.* **52**, 903–912.
